# Supplementary material for: Critical function of the necroptosis adaptor RIPK3 in protecting from intestinal tumorigenesis
Source: PubMed Central journal article supplement (PMC5216805; doi:10.18632/oncotarget.10135), 2016-06-17
Supplement: oncotarget-07-46384-s001.pdf [file oncotarget-07-46384-s001.pdf]

## Critical function of the necroptosis adaptor RIPK3 in protecting from intestinal tumorigenesis

### SUPPLEMENTARY TABLES

Supplementary Table S1: Statistical analysis of RIPK3 expression in CRC in eight different microarray databases and from various anatomical localizations

| Database/cancer type        | Cancer vs. Normal |         |
|-----------------------------|-------------------|---------|
|                             | Fold change       | p value |
| <b>Skrzypczak CRC1</b>      |                   |         |
| - Colorectal Adenocarcinoma | -1.502            | 1.3E-07 |
| <b>Skrzypczak CRC2</b>      |                   |         |
| - Colorectal Adenocarcinoma | -1.791            | 5.1E-10 |
| <b>Sabates Belver colon</b> |                   |         |
| - Colon Adenocarcinoma      | -1.142            | 4.7E-02 |
| - Rectum Adenocarcinoma     | -1.264            | 2.5E-02 |
| <b>Ki Colon</b>             |                   |         |
| - Colon Adenocarcinoma      | 1.076             | 7.4E-02 |
| <b>Gaedcke CRC</b>          |                   |         |
| - Rectum Adenocarcinoma     | -1.816            | 9.1E-19 |
| <b>Hong CRC</b>             |                   |         |
| - Colorectal Adenocarcinoma | -1.793            | 4.8E-07 |
| <b>Kaiser CRC</b>           |                   |         |
| - Cecum Adenocarcinoma      | -1.495            | 8.6E-04 |
| - Colon Adenocarcinoma      | -1.539            | 1.4E-03 |
| - Rectum Adenocarcinoma     | -1.558            | 7.9E-04 |
| <b>TCGA CRC</b>             |                   |         |
| - Cecum Adenocarcinoma      | -1.695            | 7.2E-05 |
| - Colon Adenocarcinoma      | -1.636            | 1.5E-05 |
| - Rectum Adenocarcinoma     | -1.586            | 5.1E-05 |

Supplementary Table S2: Primer sequences used for real time qPCR analysis

| Gene             | Specie | Primer forward (5' - 3') | Primer reverse (5' - 3') |
|------------------|--------|--------------------------|--------------------------|
| <i>Ripk3</i>     | human  | TTTGGCCTGTCCACATTTTCAG   | GGTTGGCAACTCAACTTCTCTT   |
| <i>Ll32</i>      | human  | TGTCCTGAATGTGGTCACCTGA   | CTGCAGTCTCCTTGCACACCT    |
| <i>Ll32</i>      | mouse  | GAAACTGGCGGAAACCCA       | GGATCTGGCCCTTGAACCTT     |
| <i>Tnfa</i>      | mouse  | CATCTTCTCAAATTCGAGTGACAA | TGGGAGTAGACAAGGTACAACCC  |
| <i>Il6</i>       | mouse  | CTGCAAGAGACTTCCATCCAGTT  | GAAGTAGGGAAGGCCGTGG      |
| <i>Il1β</i>      | mouse  | CGGCACACCCACCCTG         | AAACCGCTTTTCCATCTTCTTCT  |
| <i>Il11</i>      | mouse  | CTGCACAGATGAGAGACAAATTCC | GAAGCTGCAAAGATCCCAATG    |
| <i>Ifng</i>      | mouse  | AGCTCATCCGAGTGGTCCAC     | GCTTCTGAGGCTGGATTCC      |
| <i>Ccl2</i>      | mouse  | GCTGGAGCATCCACGTGTT      | ATCTTGCTGGTGAATGAGTAGCA  |
| <i>Cxcl1</i>     | mouse  | AATGAGCTGCGCTGTCAGTG     | TGAGGGCAACACCTTCAAGC     |
| <i>Cxcl2</i>     | mouse  | CCTGCCAAGGGTTGACTTCA     | TTCTGTCTGGGCGCAGTG       |
| <i>S100a9</i>    | mouse  | GGTGGAAGCACAGTTGGCA      | GTGTCCAGGTCCTCCATGATG    |
| <i>Ereg</i>      | mouse  | CACCGAGAAAGAAGGATGGA     | GATTCTCCTGGGATGCATGA     |
| <i>Mmp10</i>     | mouse  | CACAAGCCCAGCTAACTTCC     | TTTGTCTGGGGTCTCAGGTC     |
| <i>Cox2</i>      | mouse  | TGAGCACAGGATTTGACCAG     | CCTTGAAGTGGGTCAGGATG     |
| <i>Hif1a</i>     | mouse  | TGCTCATCAGTTGCCACTTC     | CCATCTGTGCCTTCATCTCA     |
| <i>Ido</i>       | mouse  | CTGCCTGTGCTGATTGAGAA     | CCTTTCGAACATCGTCATCC     |
| <i>Wnt5a</i>     | mouse  | GGTGCCATGTCTTCCAAGTT     | TGAGAAAGTCCTGCCAGTTG     |
| <i>Wisp1</i>     | mouse  | CAGATGGCTGTGAATGCTGT     | AAGGACTCGCCATTGGTGTA     |
| <i>cMyc</i>      | mouse  | TCTCCACTCACCAGCACAACTACG | ATCTGCTTCAGGACCCT        |
| <i>Cyclin D1</i> | mouse  | CCCTGACACCAATCTCCTCAAC   | GCATGGATGGCACAATCTCCT    |
| <i>Cyclin E</i>  | mouse  | ATGTGGCCGTGTTTTGCA       | GGTCTGATTTTCCGAGGCTGA    |
| <i>Cyclin B1</i> | mouse  | ACTTCAGCCTGGGTCGCC       | ACGTCAACCTCTCCGACTTTAGA  |
| <i>Bclxl</i>     | mouse  | GGTCGCATCGTGGCCTTT       | TCCGACTCACCAATACCTGCAT   |
| <i>p21</i>       | mouse  | ATTCAGAGCCACAGGCACCAT    | TCTCCGTGACGAAGTCAAAGTT   |
